# Supplementary material for: A Retrospective Cohort Analysis of Treatment Patterns Over 1 Year in Patients with Psoriasis Treated with Ixekizumab or Guselkumab
Source: Springer Nature journal article supplement (doi:10.1007/s13555-022-00686-1), 2022-02-26
Supplement: MOESM1 [file 20173166]

## **A Retrospective Cohort Analysis of Treatment Patterns Over 1 Year in Patients with Psoriasis Treated with Ixekizumab or Guselkumab**

Andrew Blauvelt, MD, MBA<sup>1</sup>; Russel Burge, PhD<sup>2,3</sup>; Gaia Gallo, MD<sup>2</sup>; Bridget Charbonneau, PhD<sup>2</sup>; William Malatestinic, Pharm D<sup>2</sup>; Baojin Zhu, PhD<sup>2</sup>; Fangyu Wang, MS<sup>2</sup>; Benjamin Lockshin, MD<sup>4</sup>

1. Oregon Medical Research Center, Portland, Oregon, US
2. Eli Lilly and Company, Indianapolis, Indiana, US
3. University of Cincinnati, Cincinnati, Ohio, US
4. DermAssociates, Silver Spring, Maryland, US

### **Corresponding author:**

Dr. Andrew Blauvelt

Oregon Medical Research Center

9495 SW Locust St., Suite G

Portland, OR 97223

Email: [ablauvelt@oregonmedicalresearch.com](mailto:ablauvelt@oregonmedicalresearch.com)

**Supplemental Table 1. Baseline demographics before and after weighting for ixekizumab vs. guselkumab for psoriasis patients with 6-month's pre-index period and ≥6-month follow-up period.**

|                                                           | Before Weighting      |                       |                  | After Weighting |             |                  |
|-----------------------------------------------------------|-----------------------|-----------------------|------------------|-----------------|-------------|------------------|
|                                                           | Ixekizumab<br>(N=744) | Guselkumab<br>(N=817) | SMD <sup>a</sup> | Ixekizumab      | Guselkumab  | SMD <sup>a</sup> |
| <b>Age as of Index Date, mean ± SD</b>                    | 48.5 ± 11.8           | 48.3 ± 12.5           | 0.014            | 48.4 ± 11.8     | 48.4 ± 12.4 | 0.001            |
| <b>Male, n (%)</b>                                        | 51.3                  | 54.1                  | 0.055            | 52.9            | 52.6        | 0.006            |
| <b>Health Plan Type,<sup>b</sup> %</b>                    |                       |                       | 0.201            |                 |             | 0.016            |
| Preferred Provider Organization                           | 57.4                  | 58.9                  |                  | 58.2            | 58.1        |                  |
| Consumer-Driven Health Plan                               | 14.9                  | 11.8                  |                  | 13.1            | 13.1        |                  |
| High Deductible Health Plan                               | 9.5                   | 9.9                   |                  | 9.7             | 9.7         |                  |
| Health Maintenance Organization                           | 7.4                   | 8.2                   |                  | 7.8             | 7.8         |                  |
| Non-Capitated Point-of-Service                            | 4.6                   | 5.1                   |                  | 4.9             | 4.9         |                  |
| Other <sup>b</sup>                                        | 6.2                   | 6.1                   |                  | 6.3             | 6.3         |                  |
| <b>CCI Score, mean ± SD</b>                               | 0.60 ± 1.83           | 0.52 ± 1.55           | 0.048            | 0.56 ± 1.72     | 0.59 ± 1.75 | 0.016            |
| <b>Pre-index Biologics Use, %</b>                         |                       |                       | 0.223            |                 |             | 0.006            |
| 1                                                         | 58.6                  | 48.6                  |                  | 52.6            | 52.9        |                  |
| ≥2                                                        | 1.3                   | 0.9                   |                  | 1.1             | 1.0         |                  |
| Naive                                                     | 40.1                  | 51.0                  |                  | 46.3            | 46.1        |                  |
| <b>Pre-index Systemic Therapy or Topical Agent Use, %</b> |                       |                       | 0.044            |                 |             | 0.003            |
| 1                                                         | 31.3                  | 33.3                  |                  | 32.2            | 32.2        |                  |
| ≥2                                                        | 32.5                  | 31.1                  |                  | 31.6            | 31.8        |                  |

|                                       |             |             |       |             |             |       |
|---------------------------------------|-------------|-------------|-------|-------------|-------------|-------|
| Naive                                 | 36.2        | 35.6        |       | 36.2        | 36.1        |       |
| <b>Pre-index Phototherapy Use, %</b>  |             |             | 0.039 |             |             | 0.012 |
| 1                                     | 3.2         | 3.4         |       | 3.5         | 3.3         |       |
| ≥2                                    | 0.9         | 0.6         |       | 0.8         | 0.9         |       |
| Naïve                                 | 95.8        | 96.0        |       | 95.7        | 95.8        |       |
| <b>Comorbid Conditions, mean ± SD</b> |             |             |       |             |             |       |
| Anxiety                               | 0.10 ± 0.30 | 0.12 ± 0.33 | 0.074 | 0.11 ± 0.31 | 0.11 ± 0.31 | 0.001 |
| Hyperlipidemia                        | 0.25 ± 0.43 | 0.22 ± 0.41 | 0.073 | 0.23 ± 0.42 | 0.23 ± 0.42 | 0.004 |
| Hypertension                          | 0.28 ± 0.45 | 0.29 ± 0.45 | 0.027 | 0.28 ± 0.45 | 0.28 ± 0.45 | 0.002 |
| Sleep Apnea                           | 0.10 ± 0.30 | 0.10 ± 0.30 | 0.010 | 0.10 ± 0.30 | 0.10 ± 0.30 | 0.002 |
| Obesity                               | 0.22 ± 0.41 | 0.17 ± 0.38 | 0.121 | 0.19 ± 0.39 | 0.19 ± 0.40 | 0.004 |
| Coronary Heart Disease                | 0.04 ± 0.19 | 0.04 ± 0.21 | 0.025 | 0.04 ± 0.20 | 0.04 ± 0.20 | 0.002 |
| Osteoarthritis                        | 0.07 ± 0.26 | 0.07 ± 0.25 | 0.020 | 0.07 ± 0.25 | 0.07 ± 0.25 | 0.002 |
| Peripheral Vascular Disease           | 0.01 ± 0.09 | 0.02 ± 0.13 | 0.081 | 0.01 ± 0.12 | 0.01 ± 0.11 | 0.011 |
| Depression                            | 0.08 ± 0.27 | 0.11 ± 0.31 | 0.105 | 0.09 ± 0.29 | 0.09 ± 0.29 | 0.003 |

<sup>a</sup>A standardized difference of <0.1 is considered well balanced.

<sup>b</sup>Other category combines patients from: Cap or Part Cap POS, Comprehensive, Exclusive Provider Organization, and Unknown/Missing.

Abbreviations: CCI, Charlson Comorbidity Index; SD, standard deviation; SMD, standardized mean difference.

**Supplemental Table 2. Total days and PDC on index drug, on monotherapy, and with concomitant therapy for ixekizumab vs. guselkumab.** Data shown for patients with 6-month's pre-index period and ≥6 months of follow-up.

|                                                  | Ixekizumab (N=744) | Guselkumab (N=817) | p-value |
|--------------------------------------------------|--------------------|--------------------|---------|
| <b>Covered by Index Drug</b>                     |                    |                    |         |
| Days                                             |                    |                    |         |
| mean ± SD                                        | 328 ± 201          | 313 ± 171          |         |
| median                                           | 323                | 293                |         |
| PDC                                              |                    |                    |         |
| mean ± SD                                        | 0.59 ± 0.30        | 0.57 ± 0.27        | 0.136   |
| median                                           | 0.68               | 0.58               |         |
| Monotherapy of Index Drug                        |                    |                    |         |
| Days                                             |                    |                    |         |
| mean ± SD                                        | 306 ± 198          | 292 ± 171          |         |
| median                                           | 301                | 274                |         |
| PDC                                              |                    |                    |         |
| mean ± SD                                        | 0.55 ± 0.30        | 0.53 ± 0.27        | 0.149   |
| median                                           | 0.61               | 0.54               |         |
| Index Drug with Concomitant Therapy <sup>a</sup> |                    |                    |         |
| Days                                             |                    |                    |         |
| mean ± SD                                        | 21 ± 46            | 21 ± 46            |         |
| median                                           | 0                  | 3                  |         |

PDC

mean ± SD

0.04 ± 0.09

0.04 ± 0.08

0.699

median

0.0

0.01

---

All results based on inverse probability of treatment weighting (IPTW) data. <sup>a</sup>Biologic, systemic, or phototherapy. Abbreviations: SD, standard deviation; PDC, proportion of days covered.

**Supplemental Table 3. Discontinuation (90-day gap) or switch of index drug, observed, and weighted data.**

|                                                                                                   | Observed data, N (%)  |                       | Weighted data, % |            |
|---------------------------------------------------------------------------------------------------|-----------------------|-----------------------|------------------|------------|
|                                                                                                   | Ixekizumab<br>(N=674) | Guselkumab<br>(N=740) | Ixekizumab       | Guselkumab |
| <b>1-year Follow-up Analysis</b>                                                                  |                       |                       |                  |            |
| Patients who discontinued the index drug <sup>a</sup>                                             | 241 (35.8)            | 264 (35.7)            | 35.2             | 36.2       |
| Patients who reinitiated index drug after the allowable gap                                       | 31 (4.6)              | 64 (8.7)              | 4.7              | 8.4        |
| Patients who switched from the index drug within the allowable gap                                | 125 (18.6)            | 88 (11.9)             | 17.6             | 12.9       |
| Patients who neither switched therapy within the gap nor reinitiated the index drug after the gap | 85 (12.6)             | 112 (15.1)            | 13.0             | 14.9       |
| <b>≥6-month Follow-up Analysis</b>                                                                |                       |                       |                  |            |
| Patients who discontinued the index drug <sup>a</sup>                                             | 365 (49.1)            | 391 (47.9)            | 48.8             | 48.5       |
| Patients who reinitiated index drug after the allowable gap                                       | 58 (7.8)              | 118 (14.4)            | 8.2              | 14.1       |
| Patients who switched from the index drug within the allowable gap                                | 186 (25.0)            | 130 (15.9)            | 24.1             | 16.9       |
| Patients who neither switched therapy within the gap nor reinitiated the index drug after the gap | 121 (16.3)            | 143 (17.5)            | 16.5             | 17.5       |

<sup>a</sup>The discontinuation total includes those who discontinued and reinitiated, discontinued and switched, and who discontinued index drug and did not reinitiate index drug nor switch to a different drug within 90 days.

**Supplemental Figure 1. MarketScan Database Screening and Selection and Patient Flow.**

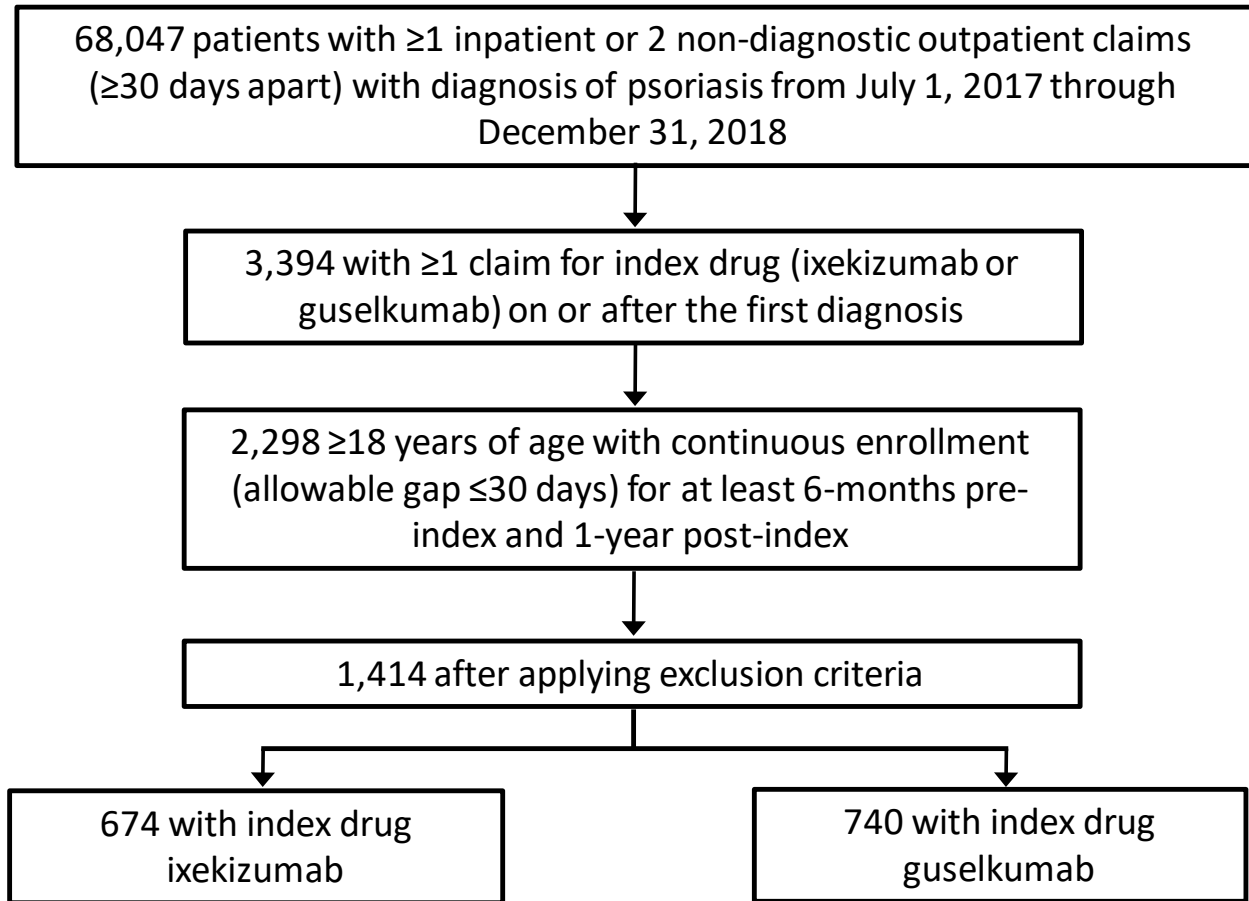

**Supplemental Figure 2. Odds of high medication adherence for ixekizumab vs. guselkumab by biologic experience and non-biologic experience.**

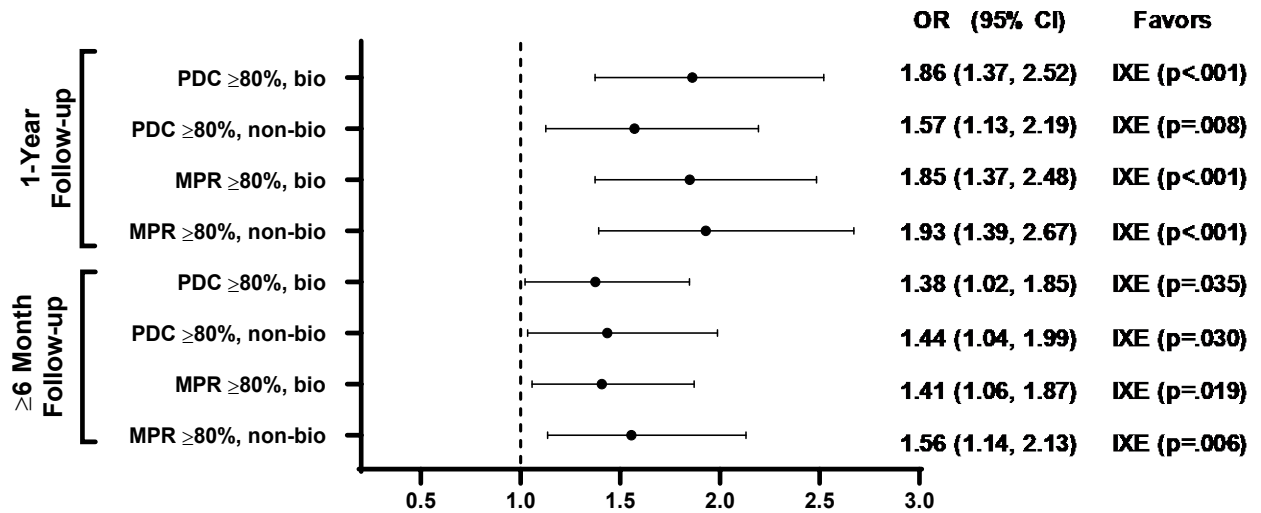

Abbreviations: bio, biologic experienced; CI, confidence interval; IXE, ixekizumab; MPR, medication possession ratio; non-bio, non-biologic experienced; OR, odds ratio; PDC, percent of days covered.
